# Supplementary material for: Establishment and Characterization of Patient-Derived Xenografts (PDXs) of Different Histology from Malignant Pleural Mesothelioma Patients
Source: PubMed Central journal article supplement (PMC7766019; doi:10.3390/cancers12123846), 2020-12-20
Supplement: cancers-12-03846-s001.pdf [file cancers-12-03846-s001.pdf]

# Supplementary Materials: Establishment and Characterization of Patient-Derived Xenografts (PDXs) of Different Histology from Malignant Pleural Mesothelioma Patients

Roberta Affatato, Paolo Mendogni, Alessandro Del Gobbo, Stefano Ferrero, Francesca Ricci, Massimo Brogini and Lorenzo Rosso

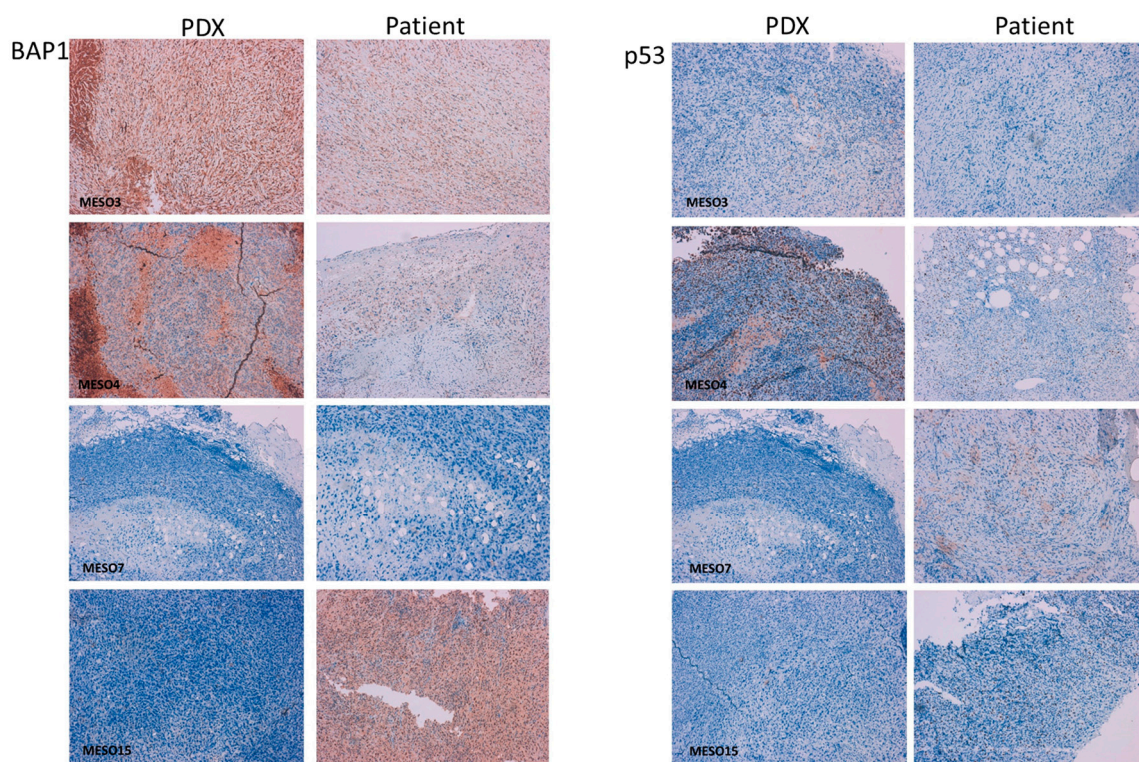

**Figure 1.** Expression of p53 and BAP1 in PDX tumor and in the original patients' tumors.

**Publisher's Note:** MDPI stays neutral with regard to jurisdictional claims in published maps and institutional affiliations.

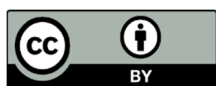

© 2020 by the authors. Licensee MDPI, Basel, Switzerland. This article is an open access article distributed under the terms and conditions of the Creative Commons Attribution (CC BY) license (<http://creativecommons.org/licenses/by/4.0/>).
